# Supplementary material for: Lung Tumor Cells with Different Tn Antigen Expression Present Distinctive Immunomodulatory Properties
Source: MDPI journal article supplement (doi:10.3390/ijms231912047), 2022-10-10
Supplement: s1 [file s1]

## Supplementary Material

### The Tn antigen confers distinctive immunomodulatory properties to lung tumor cells

**Table S1.** Plant lectin primary and secondary specificity to different glycan structures.

| Lectin                                 | Abbreviation | Primary specificity                       | Secondary specificity  | Reference |
|----------------------------------------|--------------|-------------------------------------------|------------------------|-----------|
| <i>Vicia villosa</i> isolectine B4     | VVL          | Tn, $\alpha$ -GalNAc                      | $\beta$ -GalNAc        | [51]      |
| Jacalin                                | JAC          | Gal $\beta$ (1-3)GalNAc, $\alpha$ -GalNAc | Core 3, sialyl-T       | [52]      |
| <i>Helix pomatia</i> agglutinin        | HPA          | $\alpha/ \beta$ -GalNAc                   |                        | [53]      |
| <i>Glycine max</i> agglutinin          | SBA          | $\alpha/\beta$ -GalNAc, Tn                | Gal                    | [54]      |
| <i>Dolichos biflorus</i> agglutinin    | DBA          | $\alpha$ -GalNAc, blood group A           |                        | [55]      |
| <i>Maackia amurensis</i> II agglutinin | MAL II       | NeuAca(2-3)Gal                            |                        | [56]      |
| <i>Sambucus Nigra</i> agglutinin       | SNA          | NeuAca(2-6)Gal                            | NeuAca(2-6)GalNAc, Lac | [57]      |

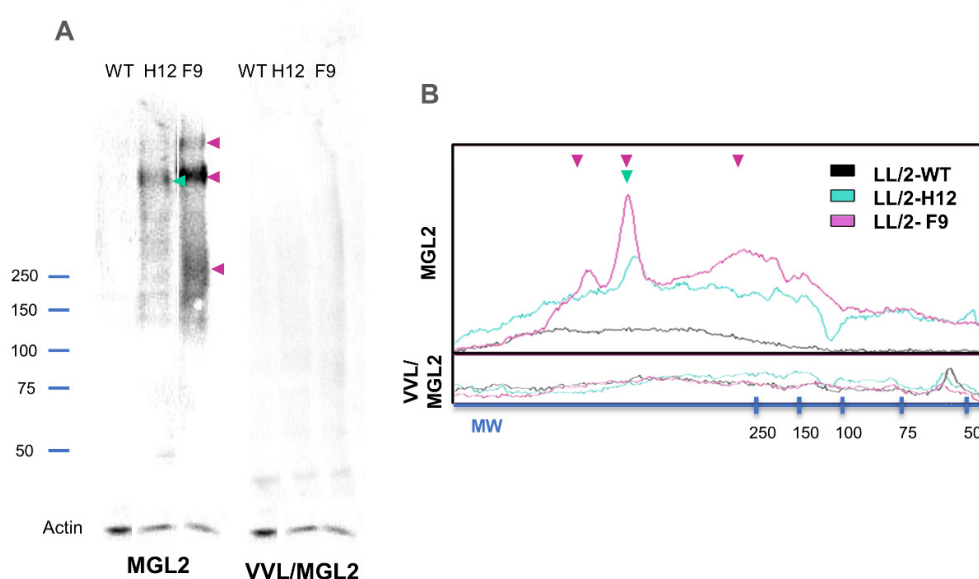

**Figure S1. VVL lectin inhibits MGL2 recognition of both LL/2 Tn<sup>+</sup> cells. (A,B)** MGL2 recognition of whole cell lysates by Western blotting. Membranes were pre-incubated with VVL and developed with MGL2-Fc. Green and violet arrows represent components recognized in LL/2-H12 and LL/2-F9 cells respectively. **(B)** Densitometry of Western blot bands after MGL2-Fc recognition, with or without pre-incubation with VVL.

### Supplementary References

51. Puri, K.D.; Gopalakrishnan, B.; Surolia, A. Carbohydrate binding specificity of the Tn-antigen binding lectin from *Vicia villosa* seeds (VVLB4). *FEBS Lett.* **1992**, *312*, 208–212.
52. Hagiwara, K.; Collet-Cassart, D.; Kobayashi, K.; Vaerman, J.P. Jacalin: isolation, characterization, and influence of various factors on its interaction with human IgA1, as assessed by precipitation and latex agglutination. *Mol. Immunol.* **1988**, *25*, 69–83.
53. Sanchez, J.-F.; Lescar, J.; Chazalet, V.; Audfray, A.; Gagnon, J.; Alvarez, R.; Breton, C.; Imberty, A.; Mitchell, E.P., Biochemical and Structural Analysis of Helix pomatia Agglutinin. *J. Biol. Chem.* **2006**, *281*, 20171–20180.
54. Dam, T.K.; Gerken, T.A.; Cavada, B.S.; Nascimento, K.S.; Moura, T.R.; Brewer, C.F. Binding Studies of  $\alpha$ -GalNAc-specific Lectins to the  $\alpha$ -GalNAc (Tn-antigen) Form of Porcine Submaxillary Mucin and Its Smaller Fragments. *J. Biol. Chem.* **2007**, *282*, 28256–28263.
55. Piller, V.; Piller, F.; Cartron, J.-P. Comparison of the carbohydrate-binding specificities of seven N-acetyl-D-galactosamine-recognizing lectins. *Eur. J. Biochem.* **1990**, *191*, 461–466.
56. Geisler, C.; DJarvis, L. Letter to the Glyco-Forum: Effective glycoanalysis with *Maackia amurensis* lectins requires a clear understanding of their binding specificities. *Glycobiology* **2011**, *21*, 988–993.
57. Shibuya, N.; Goldstein, I.J.; Broekaert, W.F.; Nsimba-Lubaki, M.; Peeters, B.; Peumans, W.J. The elderberry (*Sambucus nigra* L.) bark lectin recognizes the Neu5Ac( $\alpha$ 2-6)Gal/GalNAc sequence. *J. Biol. Chem.* **1987**, *262*, 1596–1601.
